# Supplementary material
Source: MDPI journal article supplement (https://www.mdpi.com/1996-1073/16/6/2795)
Supplement: s1 [file s1]

Supplementary Material – Unpublished documents and data sources from the Lublin City Hall.

1. What does Lublin need? Report of a study on the quality of life in Lublin's neighbourhoods, Lublin City Hall, Lublin 2019.
2. Diagnosis Lublin 2030: Development directions of the city of Lublin until 2030. The perspective of Lublin business, Lublin City Hall, Lublin 2021.
3. Diagnosis Lublin 2030. Opinions of Lublin residents about their city. Report from the survey conducted in 2021, Lublin City Hall, Lublin 2021.
4. Diagnosis Lublin 2030. Report on the survey of living conditions in the districts, Lublin City Hall, Lublin 2020.
5. Diagnosis Lublin 2030. The survey report, Lublin City Hall, Lublin 2021.
6. Diagnosis Lublin 2030. Report on qualitative research and participatory activities, Lublin City Hall, Lublin 2021.
7. Diagnosis Lublin 2030. Conclusions from qualitative analysis of materials collected during Mobile Points, Lublin City Hall, Lublin 2020.
8. How is Lublin developing? Monitoring report on the implementation of the Development Strategy of Lublin for 2013-2020, Lublin City Hall, Lublin 2016, 2017, 2018, 2020.
9. Directions of spatial and investment development of Lublin. Report, Lublin City Hall, Lublin 2019.
10. Vocational education in Lublin tailored to the needs of the economy and changes in the labour market. Analysis of the possibilities of supporting the development of vocational education - the perspective of employers and the labour market, Lublin City Hall, Lublin, Lublin 2016.
11. Opinions of Lublin residents about their city, Lublin City Hall, Lublin 2016, 2017, 2018, 2019.
12. Foresight Lublin 2050 report, Lublin City Hall, Lublin 2018.
13. Future Game report, Lublin City Hall, Lublin 2020.
14. Final report on the work of the Thematic Working Groups, Lublin City Hall, Lublin 2021.
15. State of the City of Lublin Report for 2018, Lublin City Hall, Lublin 2019.
16. State of the City of Lublin Report for 2019, Lublin City Hall, Lublin 2020.
17. State of the City of Lublin Report for 2020, Lublin City Hall, Lublin 2021.
18. Future workshop report 14-15.11.2020, Lublin City Hall, Lublin 2020.
19. Smart City Roadshow. Lublin, Report, Urban Workshop, Lublin 2018.
20. Economic Specializations of Lublin - in the new European system of economic interdependence (in the perspective until 2030), Lublin City Hall, Lublin 2021.
21. Strategy Lublin 2030. Summary of the workshop (28.02.2019), infuture hatalska foresight institute, Lublin 2019.
22. Let's come up with Lublin 2030 together. Report from analysis of open questions of the online survey, Lublin City Hall, Lublin 2020
